# Supplementary material for: [RuIII(edta)(H2O)]−mediated oxidation of hydroxyurea with H2O2. Kinetic and mechanistic investigation
Source: Royal Society of Chemistry journal article supplement (doi:10.1039/b920839a), 2009-12-15

## Electronic Supporting Information (ESI)

### **[Ru<sup>III</sup>(edta)(H<sub>2</sub>O)]<sup>-</sup> mediated oxidation of hydroxyurea with H<sub>2</sub>O<sub>2</sub>. Kinetic and mechanistic investigation**

Debabrata Chatterjee, Kalyan Asis Nayak, Erika Ember and Rudi van Eldik

#### **Experimental**

**Materials.** K[Ru<sup>III</sup>(Hedta)Cl].2H<sub>2</sub>O was prepared by following the published procedure,<sup>30</sup> and characterized by elemental analysis and spectral data which were in agreement with data reported in the literature. Anal. Calculated for K[Ru<sup>III</sup>(Hedta)Cl].2H<sub>2</sub>O: C 24.0, H 3.42, N 5.59; Found. C 23.8, H 3.45, N 5.63. IR,  $\nu/\text{cm}^{-1}$ : 1720 (free -COOH), 1650 (coordinated -COO<sup>-</sup>). UV-VIS in H<sub>2</sub>O:  $\lambda_{\text{max}}/\text{nm}$  ( $\epsilon_{\text{max}}/\text{M}^{-1} \text{cm}^{-1}$ ): 283 (2800 ± 50), 350 sh (680 ± 10). The complex rapidly hydrolyses to the aqua complex when dissolved in water, and thus exists predominantly in its most labile form [Ru<sup>III</sup>(edta)(H<sub>2</sub>O)]<sup>-</sup> (**1**) in the pH range 4 to 6. Hydrogen peroxide solutions were prepared by dilution of reagent-grade 35 % (Fluka) hydrogen peroxide and stored at 4 °C prior to use. The concentration of hydrogen peroxide was periodically determined by titration with potassium permanganate. All other chemicals used were of AR grade, and doubly distilled H<sub>2</sub>O was used to prepare all solutions.

**Instrumentation.** UV-visible spectra were collected as a function of time by the use of a rapid-scanning, dual beam spectrophotometer (Specord S 600) coupled with Alalytikjena temperature controller. The measurements were made in tandem quartz cuvettes. Either a SF-61SX2 (HI-TECH) stopped-flow spectrophotometer coupled to a (KinetaScan) rapid scan spectral attachment or an Applied Photophysics SX 18.MV stopped-flow instrument coupled to an J&M rapid scan detector, and on-line data acquisition systems were used for all kinetic measurements. Kinetic measurements at high pressure were carried out using a homemade, high pressure stopped-flow system. Kinetic traces were analyzed with the OLIS KINFIT program (Bogart, GA). All the instruments were thermostated at the desired temperature (± 0.1 °C). The pH of the solutions was measured with a Mettler Delta 350 pH meter. Acetic acid-acetate buffer was used to adjust the pH of the

experimental solutions. Observed pseudo-first order rate constants ( $k_{\text{obs}}$ ) are presented as an average of several kinetic runs (at least 10 to 12) and were reproducible within  $\pm 4\%$ . Estimation of nitrite and nitrate was performed on a Dionex DX 120 chromatograph. The release of NO resulting from addition of  $\text{H}_2\text{O}_2$  to a solution of Ru-edta and HU was monitored with isolated nitric oxide meter (WP Instruments, model ISO-NO Mark II).

- A. Typical kinetic traces recorded at 370 nm for the reaction between  $[\text{Ru}(\text{edta})\text{H}_2\text{O}]^-$  ( $1.0 \times 10^{-4} \text{ M}$ ) and HOU at  $25 \text{ }^\circ\text{C}$ ,  $\text{pH} = 5.0$  (acetate buffer),  $[\text{HOU}] = 2.0 \times 10^{-3} \text{ M}$  (A),  $[\text{HOU}] = 4.0 \times 10^{-3} \text{ M}$  (B),  $[\text{HOU}] = 5.0 \times 10^{-3} \text{ M}$  (C) and  $[\text{HOU}] = 6.0 \times 10^{-3} \text{ M}$  (D).

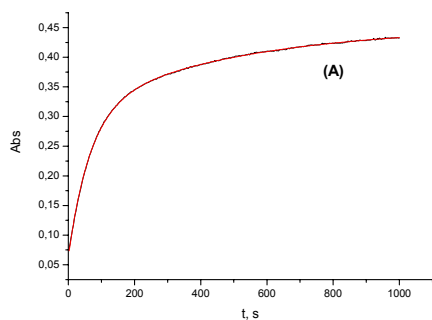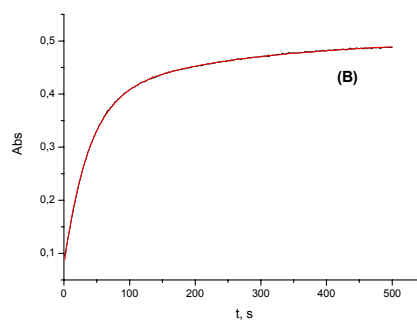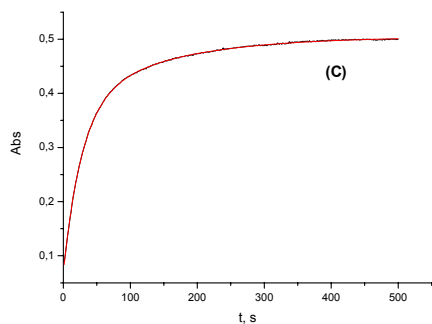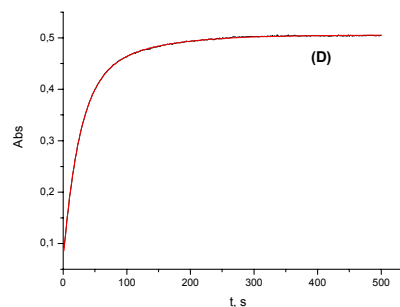

- B. Effect of [HOU] on the observed rate constant for the reaction of  $1 \times 10^{-4}$  M  $[\text{Ru}^{\text{III}}(\text{edta})(\text{H}_2\text{O})^-]$  with HOU at 25 °C and pH = 5.0.

| [HOU], M           | $k_{\text{obs}}, \text{s}^{-1}$ | $k, \text{M}^{-1} \text{s}^{-1}$ |
|--------------------|---------------------------------|----------------------------------|
| $1 \times 10^{-3}$ | 0.0065                          | $6.8 \pm 0.4$                    |
| $2 \times 10^{-3}$ | 0.014                           |                                  |
| $3 \times 10^{-3}$ | 0.018                           |                                  |
| $4 \times 10^{-3}$ | 0.028                           |                                  |
| $5 \times 10^{-3}$ | 0.035                           |                                  |
| $6 \times 10^{-3}$ | 0.040                           |                                  |
| $7 \times 10^{-2}$ | 0.048                           |                                  |

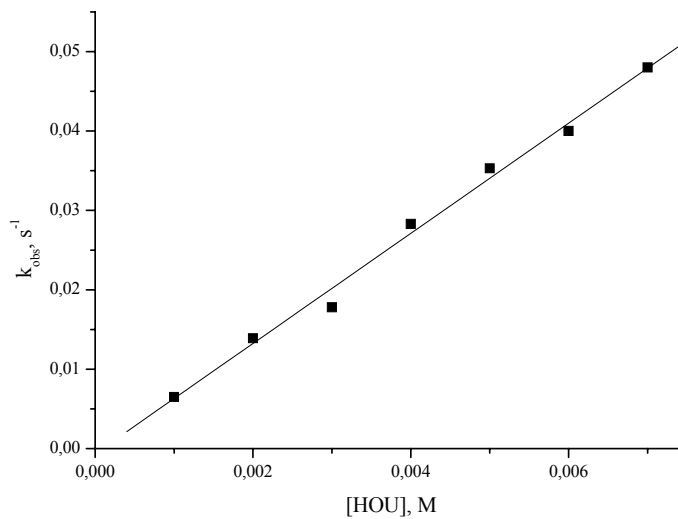

- C. Effect of temperature on the second-order rate constant for the reaction of  $1 \times 10^{-4}$  M  $[\text{Ru}^{\text{III}}(\text{edta})(\text{H}_2\text{O})]^-$  with HOU at pH = 5.0.

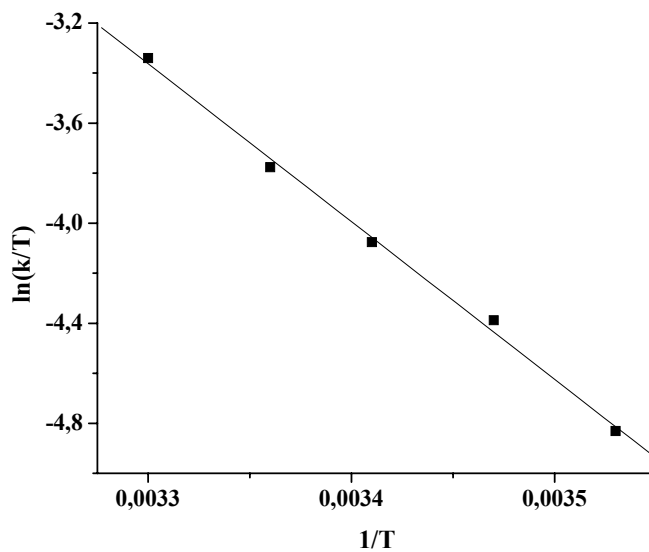

$$\Delta H^\ddagger = 52 \pm 2 \text{ kJ mol}^{-1}$$
$$\Delta S^\ddagger = -53 \pm 6 \text{ J K}^{-1} \text{ mol}^{-1}$$

- D. Effect of pressure on the second-order rate constant for the reaction of  $1 \times 10^{-4}$  M  $[\text{Ru}^{\text{III}}(\text{edta})(\text{H}_2\text{O})]^-$  with HOU at 25 °C and pH = 5.0.

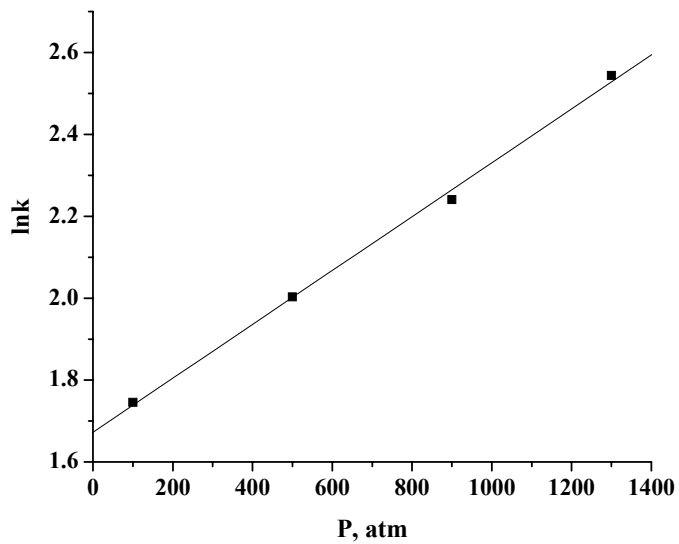

$$\Delta V^\ddagger = -16.0 \pm 0.6 \text{ cm}^3 \text{ mol}^{-1}$$

- E. Spectral changes that occur during the reaction of  $[\text{Ru}^{\text{III}}(\text{edta})(\text{OU})]^{2-}$  with  $\text{H}_2\text{O}_2$  in the presence of an excess of HOU.

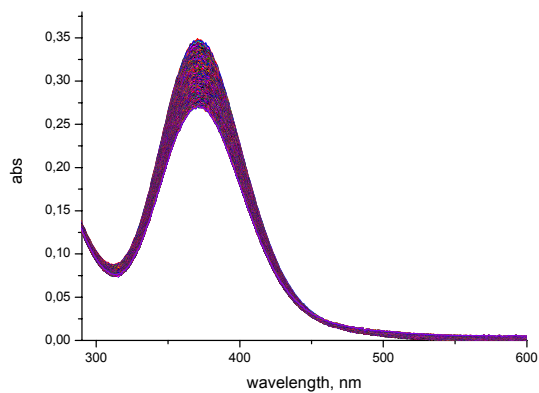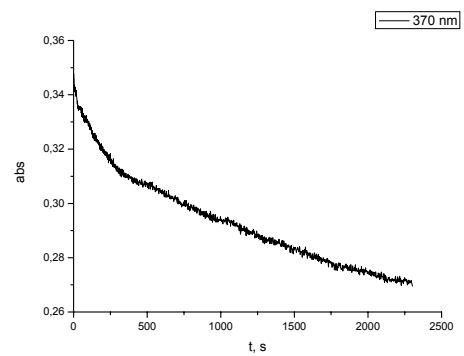

Supplement: b920839a.pdf [file b920839a.pdf]
